# Supplementary material for: Clinical and genetic variability in children with partial albinism
Source: PubMed Central journal article supplement (PMC6851142; doi:10.1038/s41598-019-51768-8), 2019-11-12

## ONLINE SUPPLEMENTARY MATERIAL

### **Clinical and genetic variability in children with partial albinism**

Patrick Campbell <sup>1†</sup>, Jamie M. Ellingford <sup>1,2†</sup>, Neil R. A. Parry <sup>3</sup>, Tracy Fletcher <sup>1</sup>,  
Simon C. Ramsden <sup>1</sup>, Theodora Gale <sup>1</sup>, Georgina Hall <sup>1</sup>, Katherine Smith <sup>4</sup>, Dalia  
Kasperaviciute <sup>4</sup>, Ellen Thomas <sup>4</sup>, I. Chris Lloyd <sup>1,5</sup>, Sofia Douzgou <sup>1,2</sup>, Jill Clayton-  
Smith <sup>1,2</sup>, Susmito Biswas <sup>3</sup>, Jane L. Ashworth <sup>3</sup>, Graeme C. M. Black <sup>1,2</sup>, Panagiotis  
I. Sergouniotis <sup>1,2,3</sup>

<sup>1</sup> Manchester Centre for Genomic Medicine, Manchester Academic Health Sciences  
Centre, Manchester University NHS Foundation Trust, St Mary's Hospital,  
Manchester, UK.

<sup>2</sup> Division of Evolution and Genomic Sciences, Faculty of Biology, Medicine and  
Health, University of Manchester, Manchester, UK,

<sup>3</sup> Manchester Royal Eye Hospital, Manchester Academic Health Science Centre,  
Manchester University NHS Foundation Trust, Manchester, UK

<sup>4</sup> Genomics England, London, UK

<sup>5</sup> Great Ormond Street Hospital for Children NHS Foundation Trust, London, UK

†PC and JE are joint first authors

Supplementary Table 1: Gene panels used in this study

| Optic nerve disorders panel (40 genes; including foveal hypoplasia & ocular/oculocutaneous albinism panels) |                                              | Foveal hypoplasia & nystagmus panel (26 genes; including ocular/oculocutaneous albinism panel) |                                                 | Ocular/oculocutaneous albinism panel (18 genes) |                                                 |
|-------------------------------------------------------------------------------------------------------------|----------------------------------------------|------------------------------------------------------------------------------------------------|-------------------------------------------------|-------------------------------------------------|-------------------------------------------------|
| Gene (HGNC)                                                                                                 | Transcript                                   | Gene (HGNC)                                                                                    | Transcript                                      | Gene (HGNC)                                     | Transcript                                      |
| ACO2                                                                                                        | NM_001098.2                                  | ACO2                                                                                           | NM_001098.2                                     | AP3B1                                           | NM_003664.4                                     |
| AP3B1                                                                                                       | NM_003664.4                                  | AP3B1                                                                                          | NM_003664.4                                     | BLOC1S3                                         | NM_212550.4                                     |
| ATOH7                                                                                                       | NM_145178.3                                  | ATOH7                                                                                          | NM_145178.3                                     | C10orf11                                        | NM_032024.3;<br>NM_001305581.1                  |
| BLOC1S3                                                                                                     | NM_212550.4                                  | BLOC1S3                                                                                        | NM_212550.4                                     | CACNA1F                                         | NM_005183.3;<br>NM_001256790.2                  |
| C10orf11                                                                                                    | NM_032024.3; NM_001305581.1                  | C10orf11                                                                                       | NM_032024.3;<br>NM_001305581.1                  | DTNBP1                                          | NM_032122.4;<br>NM_183040.2                     |
| C12orf65                                                                                                    | NM_152269.4                                  | CACNA1F                                                                                        | NM_005183.3;<br>NM_001256790.2                  | GPR143                                          | NM_000273.2                                     |
| CACNA1F                                                                                                     | NM_005183.3;<br>NM_001256790.2               | DTNBP1                                                                                         | NM_032122.4;<br>NM_183040.2                     | HPS3                                            | NM_032383.4                                     |
| CISD2                                                                                                       | NM_001008388.4                               | FRMD7                                                                                          | NM_194277.2                                     | HPS4                                            | NM_022081.5;<br>NM_152841.2                     |
| DHCR7                                                                                                       | NM_001360.2                                  | GPR143                                                                                         | NM_000273.2                                     | HPS5                                            | NM_181507.1                                     |
| DTNBP1                                                                                                      | NM_032122.4; NM_183040.2                     | HMX1                                                                                           | NM_018942.2                                     | HPS6                                            | NM_024747.5                                     |
| FRMD7                                                                                                       | NM_194277.2                                  | HPS3                                                                                           | NM_032383.4                                     | LYST                                            | NM_000081.3                                     |
| GJA1                                                                                                        | NM_000165.3                                  | HPS4                                                                                           | NM_022081.5;<br>NM_152841.2                     | OCA2                                            | NM_000275.2                                     |
| GPR143                                                                                                      | NM_000273.2                                  | HPS5                                                                                           | NM_181507.1                                     | PLDN (BLOC1S6)                                  | NM_001311255.1;<br>NM_012388.3                  |
| HMX1                                                                                                        | NM_018942.2                                  | HPS6                                                                                           | NM_024747.5                                     | SLC24A5                                         | NM_205850.2                                     |
| HPS3                                                                                                        | NM_032383.4                                  | LYST                                                                                           | NM_000081.3                                     | SLC45A2                                         | NM_016180.4;<br>NM_001012509.3                  |
| HPS4                                                                                                        | NM_022081.5; NM_152841.2                     | OCA2                                                                                           | NM_000275.2                                     | SLC4A11                                         | NM_032034;<br>NM_001174089.1;<br>NM_001174090.1 |
| HPS5                                                                                                        | NM_181507.1                                  | PAX6                                                                                           | NM_001604.4                                     | TYR                                             | NM_000372.4                                     |
| HPS6                                                                                                        | NM_024747.5                                  | PLDN (BLOC1S6)                                                                                 | NM_001311255.1;<br>NM_012388.3                  | TYRP1                                           | NM_000550.2                                     |
| HPS6                                                                                                        | NM_024747.5                                  | RTN4IP1                                                                                        | NM_032730.4                                     |                                                 |                                                 |
| LARGE                                                                                                       | NM_004737.4                                  | SIX6                                                                                           | NM_007374.2                                     |                                                 |                                                 |
| LYST                                                                                                        | NM_000081.3                                  | SLC24A5                                                                                        | NM_205850.2                                     |                                                 |                                                 |
| OCA2                                                                                                        | NM_000275.2                                  | SLC38A8                                                                                        | NM_001080442.1                                  |                                                 |                                                 |
| OPA1                                                                                                        | NM_015560.2; NM_130837.2                     | SLC45A2                                                                                        | NM_016180.4;<br>NM_001012509.3                  |                                                 |                                                 |
| OPA3                                                                                                        | NM_025136.3; NM_001017989.2                  | SLC4A11                                                                                        | NM_032034;<br>NM_001174089.1;<br>NM_001174090.1 |                                                 |                                                 |
| PAX6                                                                                                        | NM_001604.4                                  | TYR                                                                                            | NM_000372.4                                     |                                                 |                                                 |
| PLDN (BLOC1S6)                                                                                              | NM_001311255.1; NM_012388.3                  | TYRP1                                                                                          | NM_000550.2                                     |                                                 |                                                 |
| RAB18                                                                                                       | NM_021252.3                                  |                                                                                                |                                                 |                                                 |                                                 |
| RAB3GAP1                                                                                                    | NM_001172435.1                               |                                                                                                |                                                 |                                                 |                                                 |
| RAB3GAP2                                                                                                    | NM_012414.3                                  |                                                                                                |                                                 |                                                 |                                                 |
| RTN4IP1                                                                                                     | NM_032730.4                                  |                                                                                                |                                                 |                                                 |                                                 |
| SIX6                                                                                                        | NM_007374.2                                  |                                                                                                |                                                 |                                                 |                                                 |
| SLC24A5                                                                                                     | NM_205850.2                                  |                                                                                                |                                                 |                                                 |                                                 |
| SLC38A8                                                                                                     | NM_001080442.1                               |                                                                                                |                                                 |                                                 |                                                 |
| SLC45A2                                                                                                     | NM_016180.4; NM_001012509.3                  |                                                                                                |                                                 |                                                 |                                                 |
| SLC4A11                                                                                                     | NM_032034; NM_001174089.1;<br>NM_001174090.1 |                                                                                                |                                                 |                                                 |                                                 |
| SOX2                                                                                                        | NM_003106.3                                  |                                                                                                |                                                 |                                                 |                                                 |
| TBC1D20                                                                                                     | NM_144628.3                                  |                                                                                                |                                                 |                                                 |                                                 |
| TMEM126A                                                                                                    | NM_032273.3                                  |                                                                                                |                                                 |                                                 |                                                 |
| TYR                                                                                                         | NM_000372.4                                  |                                                                                                |                                                 |                                                 |                                                 |
| TYRP1                                                                                                       | NM_000550.2                                  |                                                                                                |                                                 |                                                 |                                                 |
| WFS1                                                                                                        | NM_006005.3                                  |                                                                                                |                                                 |                                                 |                                                 |

It was not possible to gain acceptable coverage of *HPS1* and it was therefore not included in these clinical diagnostic panels. *AP3D150*, *MITF51*, and *GNAI3* were also not included.

# Supplementary File: Family trees of children with partial albinism

## Proband 1

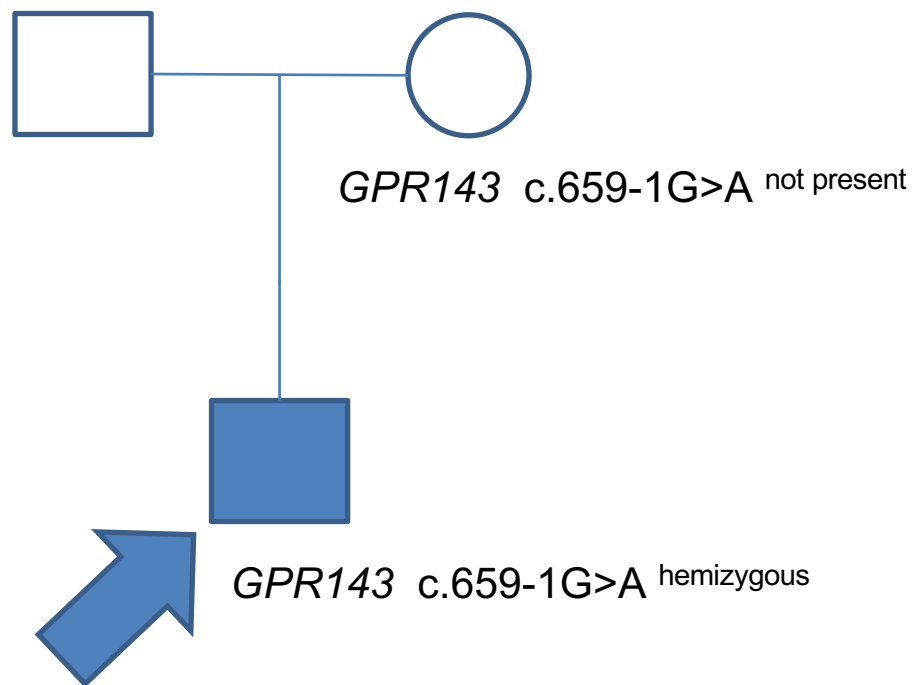

■ affected

□ unaffected

# Proband 4

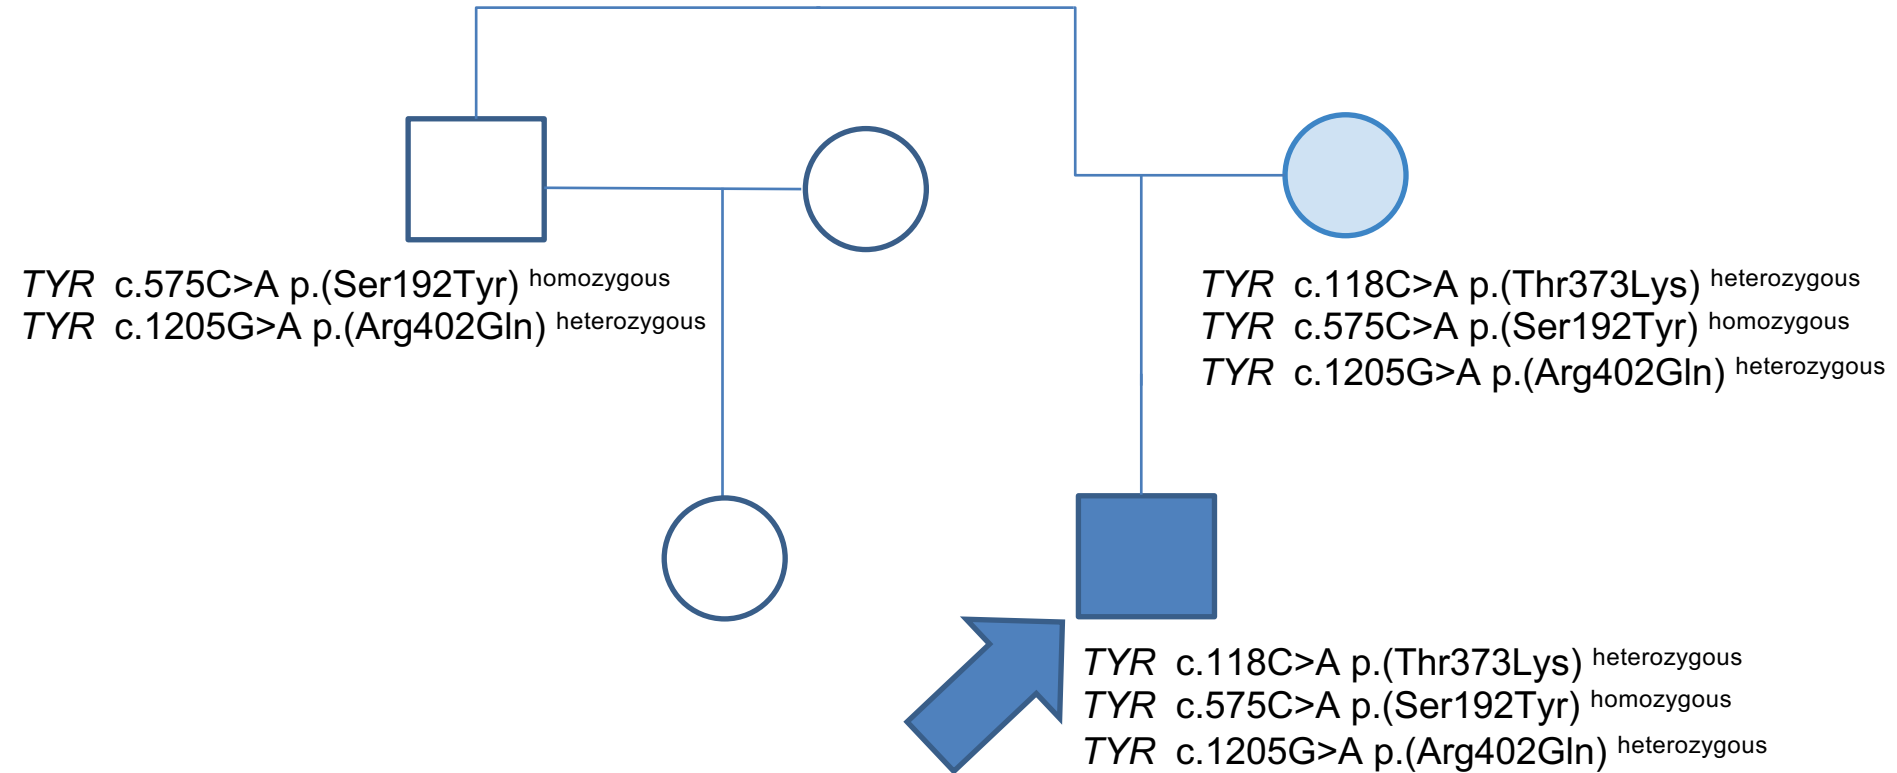

○ intermediate phenotype  
(mild transillumination, foveal hypoplasia but no nystagmus)

# Proband 5

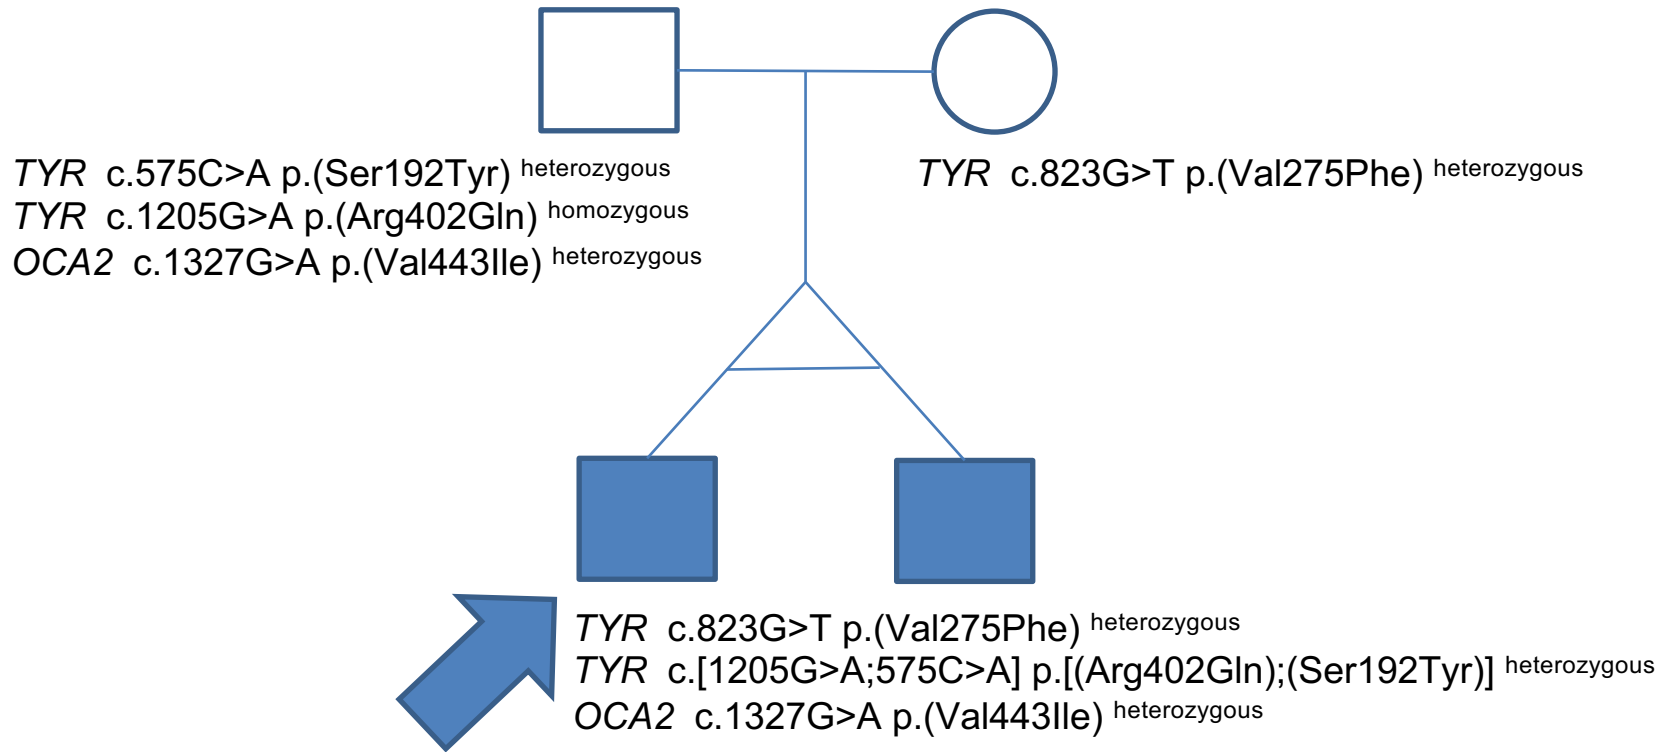

# Proband 6

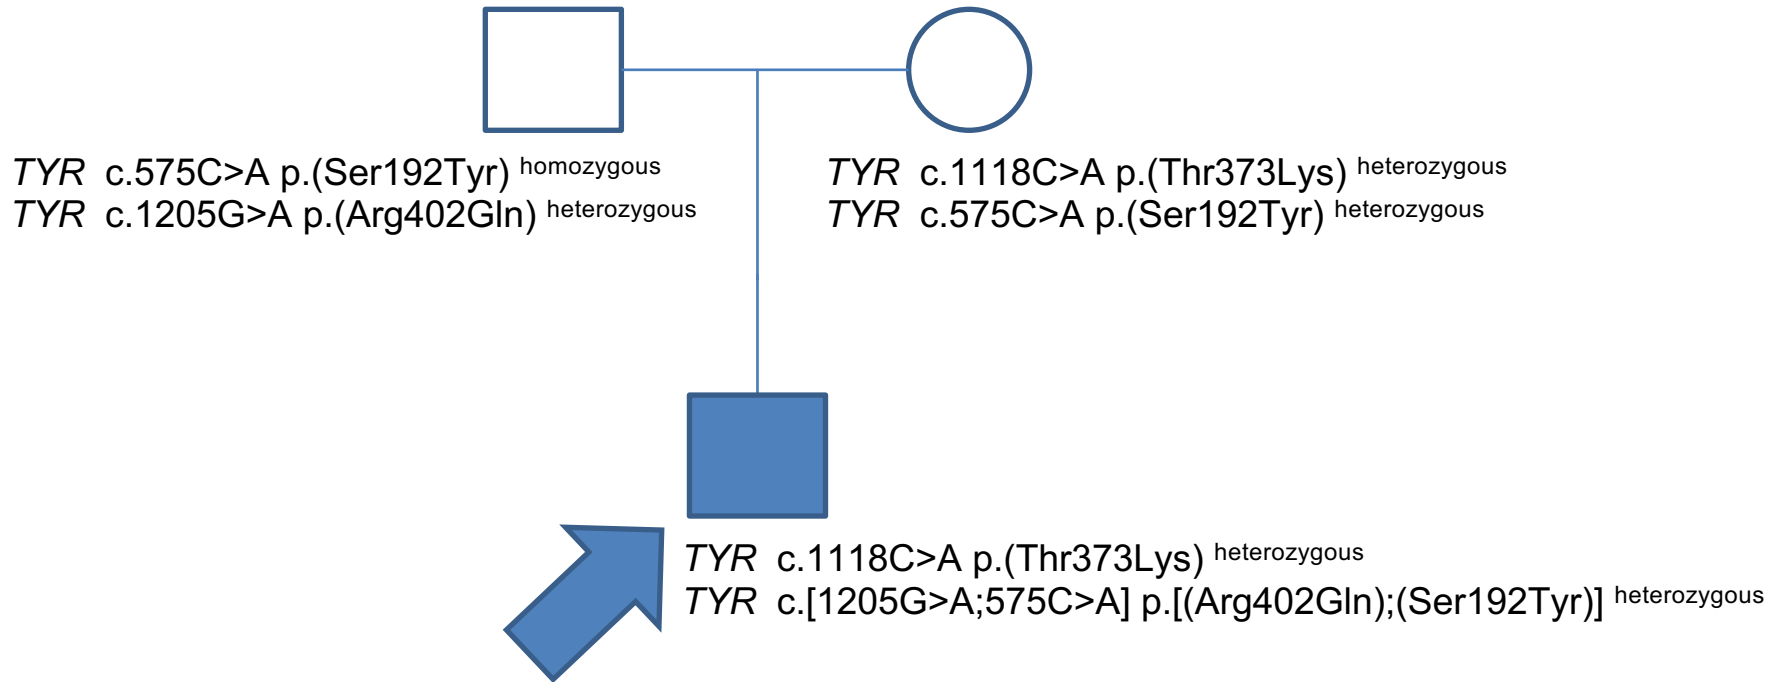

# Proband 8

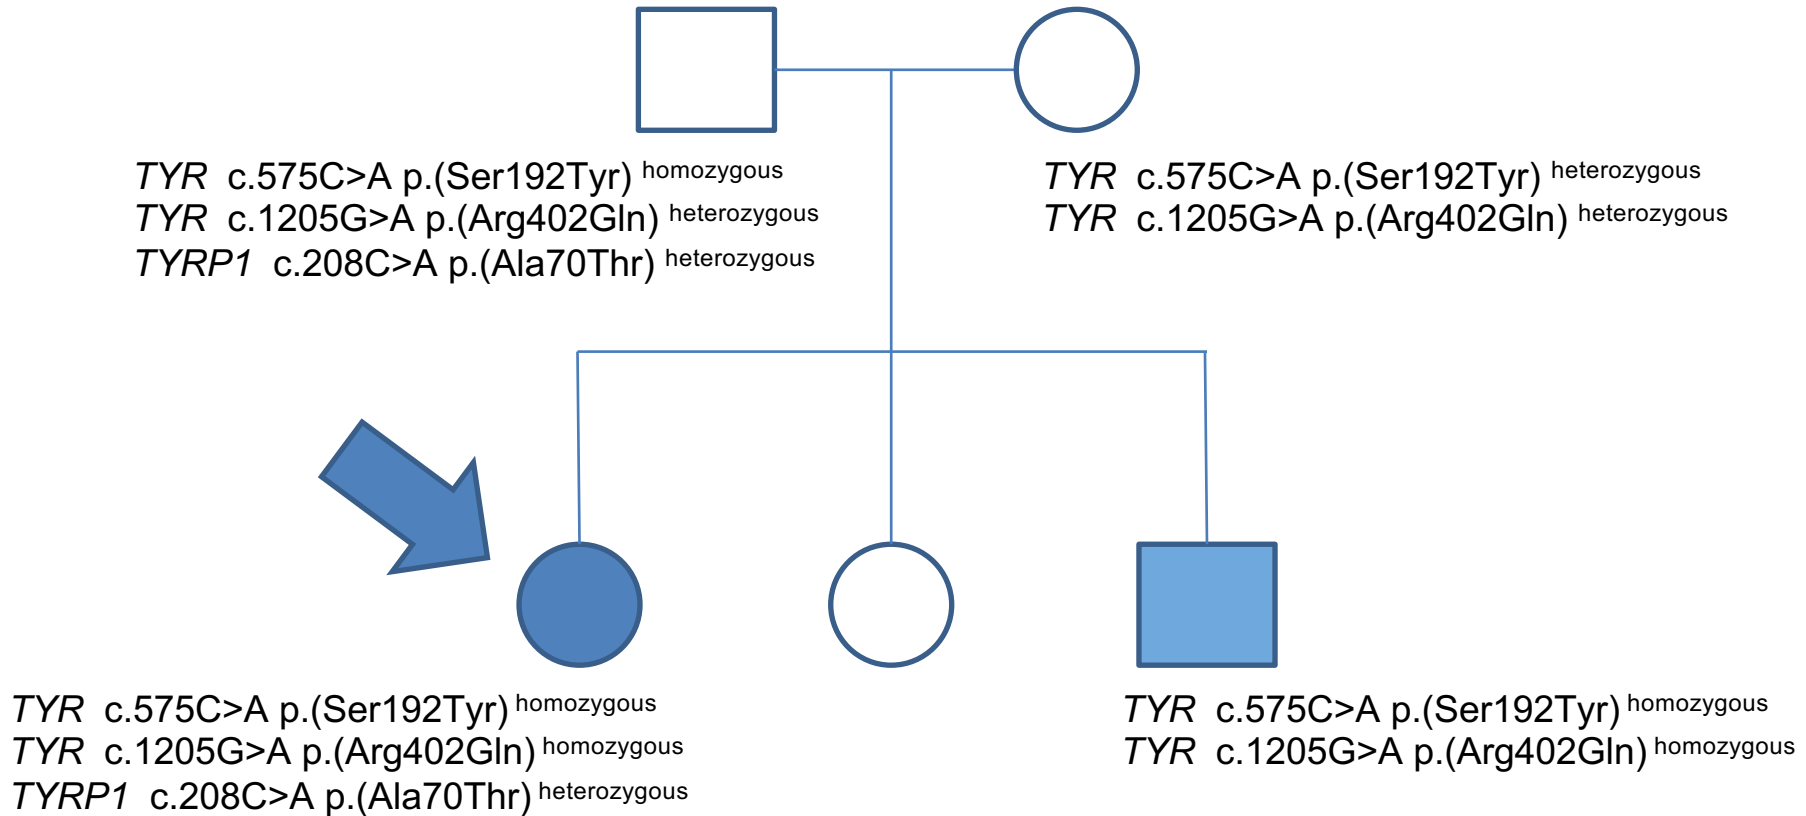

 Likely ocular albinism phenotype (nystagmus present but no clinical tests performed yet as <1y old)

# Proband 10

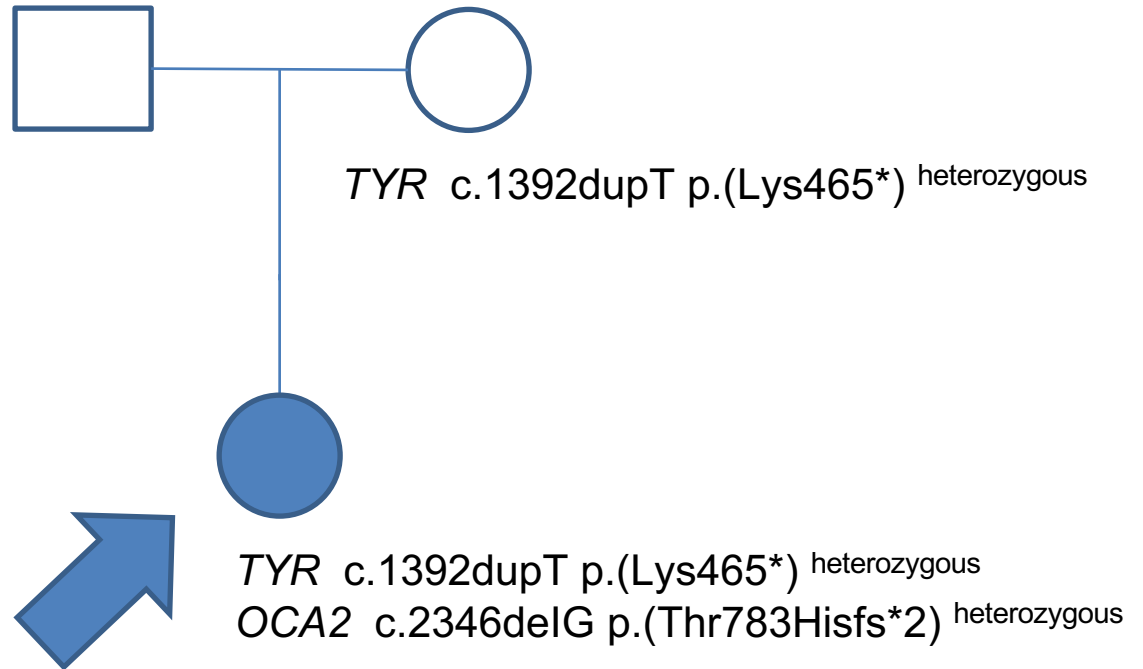



# Proband 11

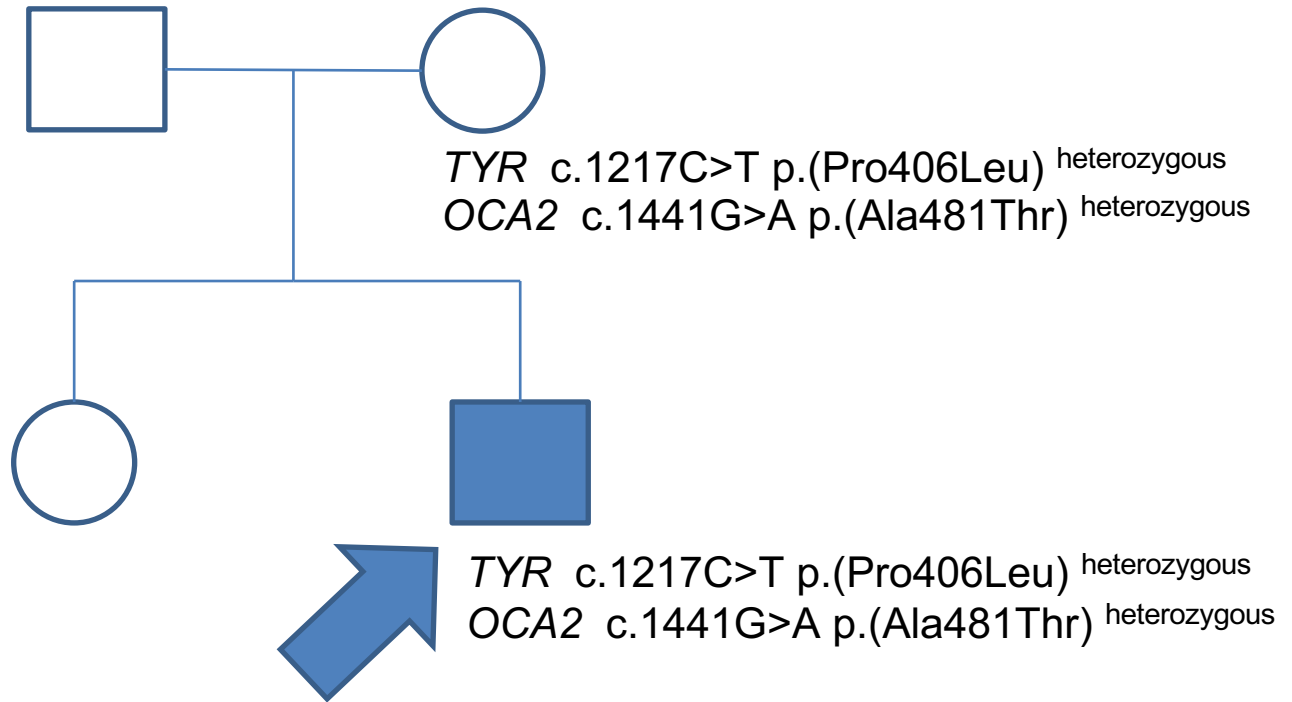

Supplement: 41598_2019_51768_MOESM1_ESM.pdf [file 41598_2019_51768_MOESM1_ESM.pdf]
